# Supplementary material for: Biomaterials and Electroactive Bacteria for Biodegradable Electronics
Source: Frontiers journal article supplement (doi:10.3389/fmicb.2022.906363), 2022-06-10
Supplement: Image_1.pdf [file Image_1.pdf]

# Biomaterials and electroactive bacteria for biodegradable electronics – Supplementary material

Robin Bonné<sup>1\*</sup> & Koen Wouters<sup>2</sup>, Jamie J. M. Lustermans<sup>1</sup> and Jean V. Manca<sup>2</sup>

<sup>1</sup> Center for Electromicrobiology, Department of Biology, Aarhus University, Aarhus, Denmark

<sup>2</sup> X-LAB, Hasselt University, Diepenbeek, Belgium

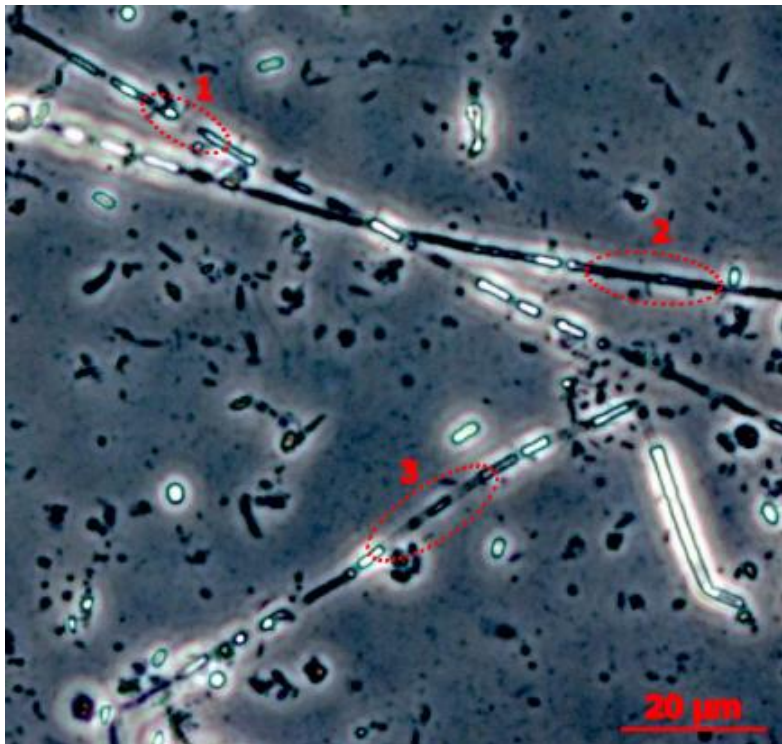

Figure S1 | Freshwater cable bacteria (*Candidatus Electronema aureum* GS) from 21-days-old sediment from the oxic zone that was used to fill a trench slide (as described in Thorup *et al.*, 2021). Micrograph shows cable bacteria that have been in this slide for 9 days with a degraded cable bacterial cell (1), intact cable bacterial cells (2), and partially degraded cable bacterium where the filaments are visible as shadow lines in between remaining cell material (3).
